# Supplementary material for: Tuning the fluorescence emission of DADQ based molecular solids by dielectric environment variation
Source: Royal Society of Chemistry journal article supplement (doi:10.1039/d4tc02052a), 2024-01-01

*Electronic Supplementary Information for*

**Tuning the Fluorescence Emission of DADQ Based Molecular Solids by  
Dielectric Environment Variation**

Nikita Mahajan and T. P. Radhakrishnan\*

School of Chemistry, University of Hyderabad, Hyderabad – 500 046, **India**

\*Email: tpr@uohyd.ac.in

| <b>Content</b>                                                           | <b>Page</b> |
|--------------------------------------------------------------------------|-------------|
| Fluorescence emission tuning in DADQ derivatives (Figure S1)             | S2-S3       |
| Crystallographic details (Figure S2, Tables S1-S3)                       | S4-S7       |
| Fluorescence excitation spectra (Figure S3)                              | S8          |
| Fluorescence changes of BFPDQ-PVDF and BMPDQ-PVDF (Figure S4)            | S9          |
| Fluorescence changes of BMPDQ on exposure to different acids (Figure S5) | S10         |
| Optical images of BFPDQ acid exposed and recrystallised (Figure S6)      | S11         |
| <sup>13</sup> C NMR spectra of BFPDQ and BMPDQ (Figure S7)               | S12         |
| HRMS of BFPDQ and BMPDQ exposed to acetic acid vapor (Figure S8)         | S13         |
| Assignment of the HRMS peaks of BFPDQ and BMPDQ (Table S4)               | S13         |
| Computational details (Tables S5, S6)                                    | S14-S23     |
| Capacitance measurements (Figure S9, Table S7)                           | S24         |
| SKPM topography and surface potential images of BMPDQ (Figure S10)       | S25         |

**Figure S1.** (a) Schematic diagram of the setup used for exposing the DADQ samples to acid vapors at a controlled temperature. (b) The structure and (c) optical images (under UV light) of the DADQs upon exposure to acetic acid vapor for different time periods (min) showing the fluorescence changes and the corresponding fluorescence emission spectra [BFPDQ ( $\lambda_{\text{exc}} = 380$  nm), BMPDQ ( $\lambda_{\text{exc}} = 395$  nm), BNMPDQ ( $\lambda_{\text{exc}} = 400$  nm), BPPDQ ( $\lambda_{\text{exc}} = 400$  nm), and BBADQ ( $\lambda_{\text{exc}} = 395$  nm)].

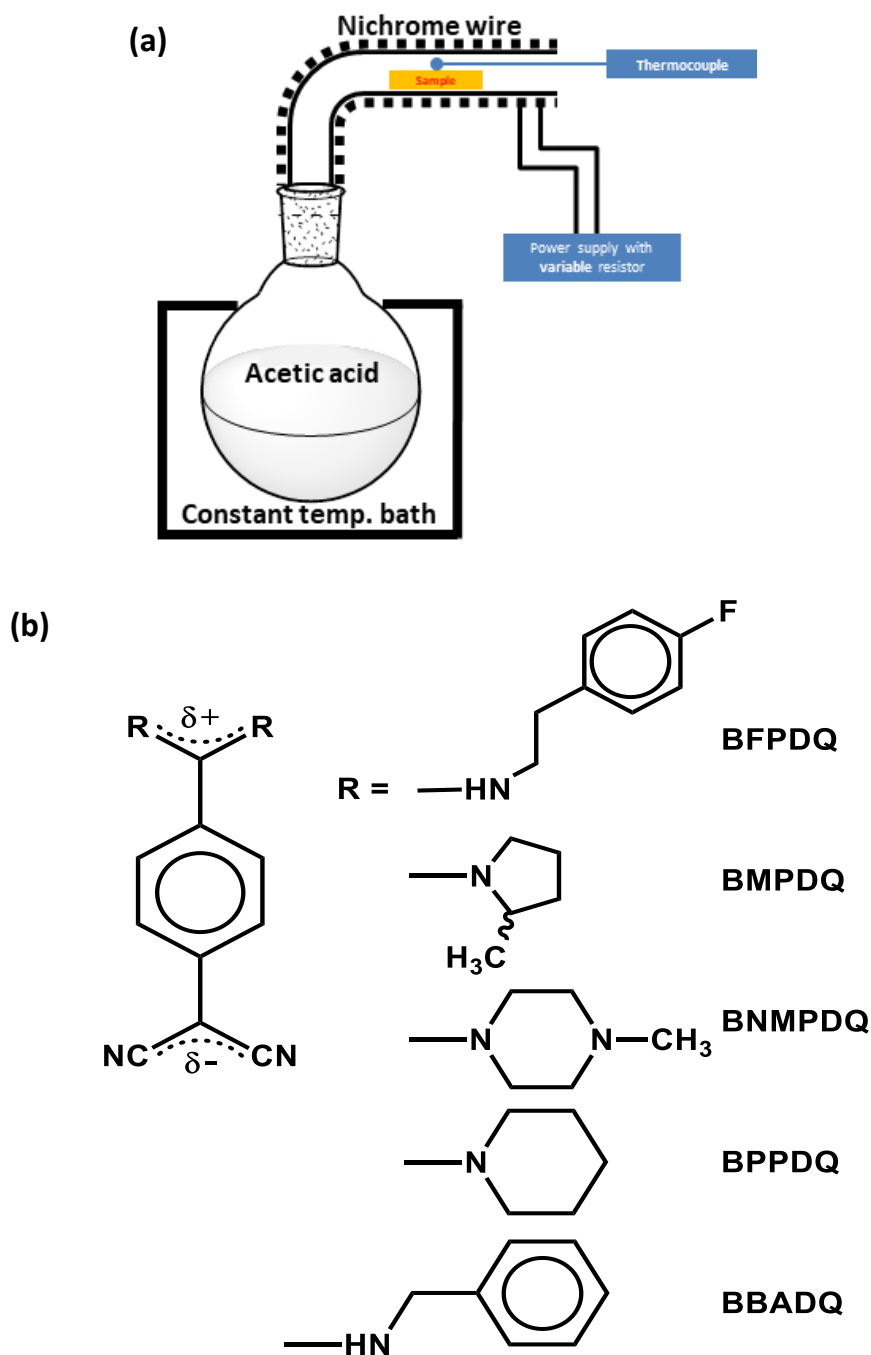

Figure 1 (contd...)

Figure 1(c)

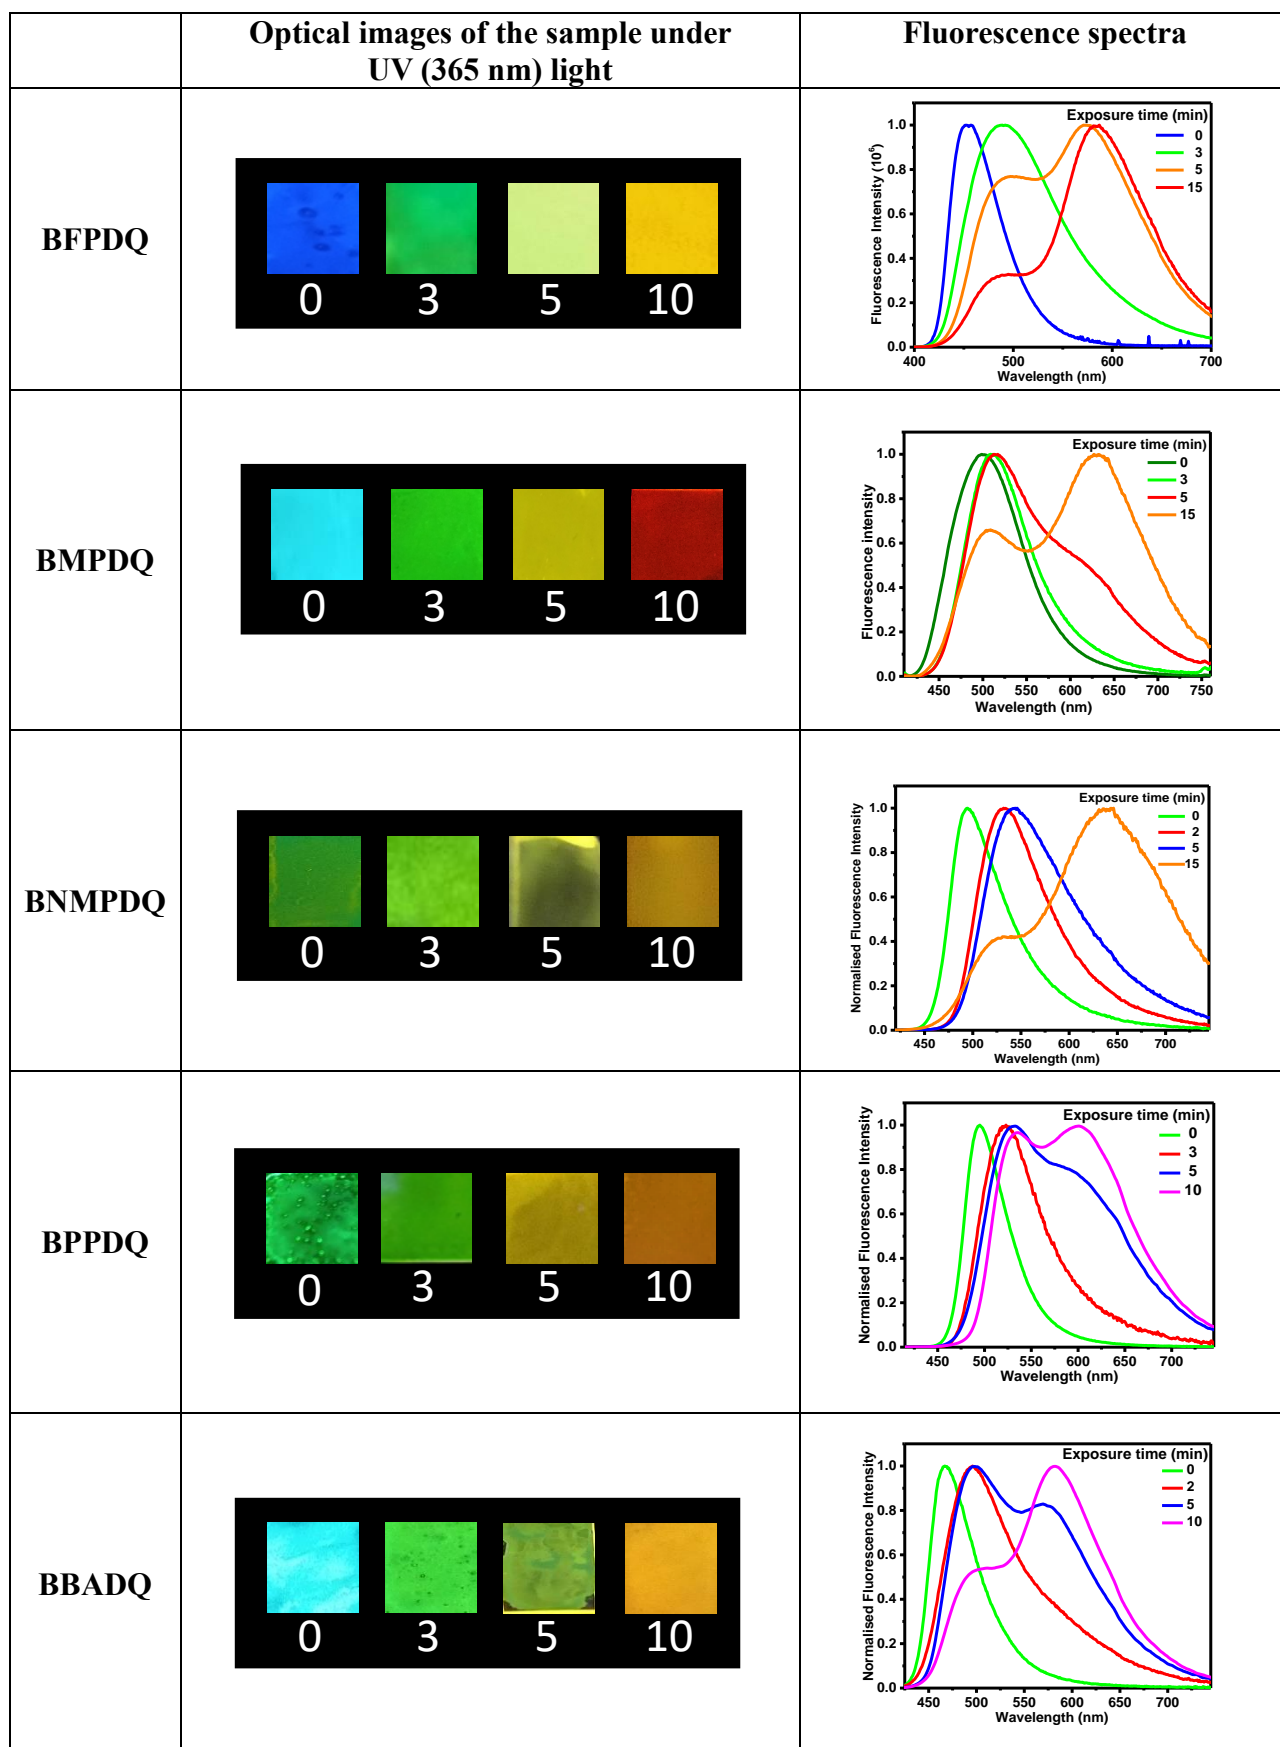

### Crystallographic details

**Table S1.** Crystallographic data of BFPDQ and BMPDQ.

|                                                      | <b>BFPDQ</b>                                                  | <b>BFPDQ-Ac*</b>                                              | <b>BMPDQ</b>                                   |
|------------------------------------------------------|---------------------------------------------------------------|---------------------------------------------------------------|------------------------------------------------|
| Empirical Formula                                    | C <sub>26</sub> H <sub>22</sub> N <sub>4</sub> F <sub>2</sub> | C <sub>26</sub> H <sub>22</sub> N <sub>4</sub> F <sub>2</sub> | C <sub>20</sub> H <sub>24</sub> N <sub>4</sub> |
| Crystal system                                       | Monoclinic                                                    | Monoclinic                                                    | Monoclinic                                     |
| Space group                                          | P2 <sub>1</sub> /c                                            | P2 <sub>1</sub> /c                                            | C2/c                                           |
| a / Å                                                | 9.555(3)                                                      | 9.5002(4)                                                     | 13.2460 (12)                                   |
| b / Å                                                | 15.114(5)                                                     | 15.0682(8)                                                    | 11.8421 (9)                                    |
| c / Å                                                | 15.708(5)                                                     | 15.6698(8)                                                    | 11.3670 (12)                                   |
| β / °                                                | 102.466(11)                                                   | 102.424(5)                                                    | 97.842 (9)                                     |
| V / Å <sup>3</sup>                                   | 2215.0(12)                                                    | 2190.62(19)                                                   | 1766.4 (3)                                     |
| Z                                                    | 4                                                             | 4                                                             | 4                                              |
| ρ <sub>calc</sub> (g cm <sup>-3</sup> )              | 1.285                                                         | 1.299                                                         | 1.205                                          |
| μ (mm <sup>-1</sup> )                                | 0.089                                                         | 0.090                                                         | 0.073                                          |
| Temperature (K)                                      | 293                                                           | 293                                                           | 100                                            |
| λ (Å)                                                | 0.71073                                                       | 0.71073                                                       | 0.71073                                        |
| No. of reflections                                   | 5430                                                          | 4651                                                          | 1532                                           |
| No. of parameters                                    | 289                                                           | 289                                                           | 113                                            |
| Max., Min. transmission                              | 0.990, 0.981                                                  | 0.991, 0.986                                                  | 0.990, 0.985                                   |
| GOF                                                  | 1.0332                                                        | 1.1132                                                        | 0.969                                          |
| R [for I ≥ σ <sub>1</sub> ]                          | 0.0554                                                        | 0.0583                                                        | 0.0684                                         |
| wR <sup>2</sup>                                      | 0.1555                                                        | 0.1977                                                        | 0.2204                                         |
| Largest difference peak and hole / e Å <sup>-3</sup> | 0.37/-0.32                                                    | 0.32/-0.35                                                    | 0.35/-0.38                                     |
| CCDC deposition number                               | 2350446                                                       | 2350467                                                       | 2350461                                        |

\*BFPDQ treated with acetic acid and recrystallized

**Figure S2.** Molecular structure of (a) BFPDQ (b) BFPDQ treated with acetic acid, and (c) BMPDQ from single crystal X-ray diffraction analysis. C (grey), N (blue), F (green) and H (white) atoms are shown with 90% thermal ellipsoids.

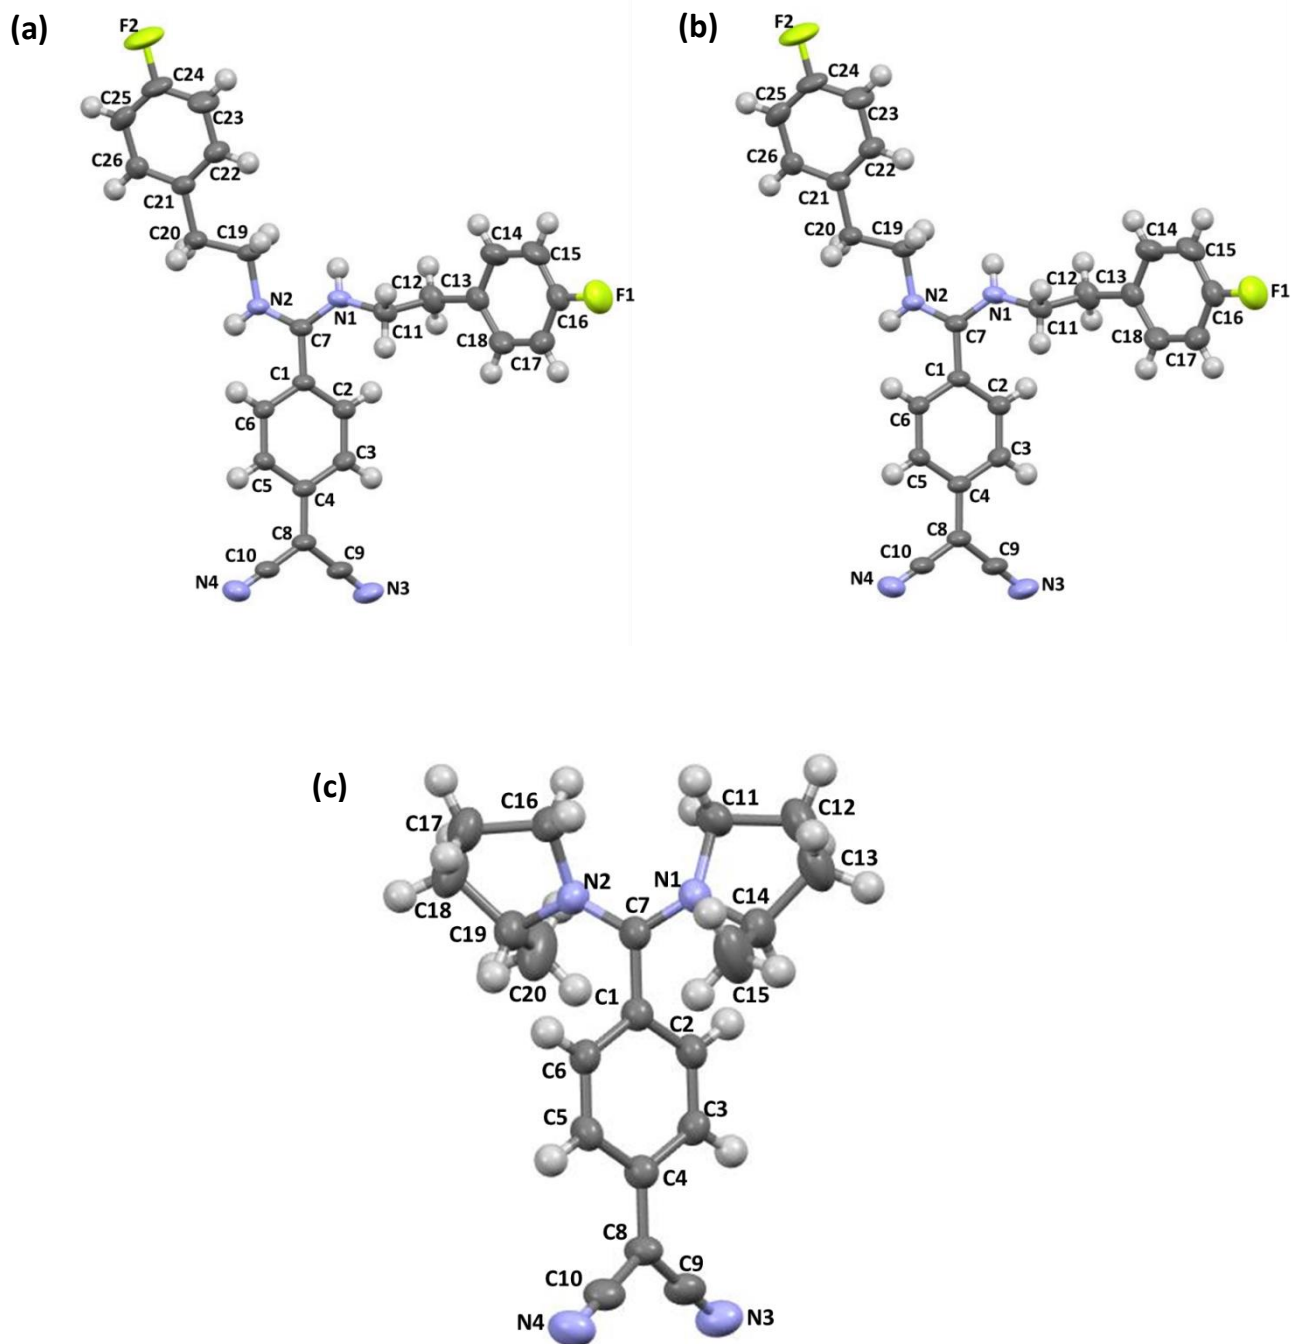

**Table S2.** Bond lengths, bond angles and relevant torsion angles in BFPDQ (Figure S2a).

| Atoms   | Bond Length (Å) |
|---------|-----------------|
| F2-C24  | 1.359 (3)       |
| F1-C16  | 1.368 (3)       |
| N1-C11  | 1.469 (3)       |
| N1-C7   | 1.322 (3)       |
| N2-C7   | 1.323 (3)       |
| N2-C19  | 1.462 (3)       |
| C2-C1   | 1.397 (3)       |
| C2-C3   | 1.392 (3)       |
| N3-C9   | 1.161 (2)       |
| N4-C10  | 1.155 (4)       |
| C16-C17 | 1.364(5)        |
| C16-C15 | 1.364 (5)       |
| C17-C18 | 1.390 (4)       |
| C18-C13 | 1.384 (4)       |
| C13-C12 | 1.522 (3)       |
| C13-C14 | 1.391 (4)       |
| C12-C11 | 1.497 (4)       |
| C7-C1   | 1.464 (3)       |
| C19-C20 | 1.546 (4)       |
| C20-C21 | 1.513 (4)       |
| C21-C26 | 1.403 (4)       |
| C21-C22 | 1.395 (4)       |
| C26-C25 | 1.380 (5)       |
| C25-C24 | 1.371 (4)       |
| C24-C23 | 1.386 (5)       |
| C1-C6   | 1.410 (3)       |
| C3-C4   | 1.413 (3)       |
| C4-C5   | 1.422 (4)       |
| C4-C8   | 1.446 (3)       |
| C5-C6   | 1.377 (3)       |
| C8-C9   | 1.407 (4)       |
| C8-C10  | 1.400 (4)       |
| C23-C22 | 1.375 (5)       |
| C14-C15 | 1.392 (4)       |

| Atoms        | Torsion angle (°) |
|--------------|-------------------|
| N2-C7-C1-C6  | 43.714 (2)        |
| N1-C7-C1-C2  | 40.471 (5)        |
| C3-C4-C8-C9  | 8.386 (2)         |
| C5-C4-C8-C10 | 9.571 (2)         |

| Atoms       | Bond Angle (°) |
|-------------|----------------|
| C7-N1-C11   | 122.88 (19)    |
| H1-N1-C11   | 118.56 (12)    |
| H1-N1-C7    | 118.56 (12)    |
| C19-N2-C7   | 128.4 (2)      |
| H2-N2-C7    | 115.81 (13)    |
| H2-N2-C19   | 115.81 (12)    |
| C3-C2-C1    | 121.5 (2)      |
| C17-C16-F1  | 118.5 (3)      |
| C15-C16-F1  | 118.0 (3)      |
| C15-C16-C17 | 123.4 (3)      |
| C18-C17-C16 | 118.2 (3)      |
| C13-C18-C17 | 120.9 (3)      |
| C12-C13-C18 | 117.7 (2)      |
| C14-C13-C18 | 118.6 (2)      |
| C14-C13-C12 | 123.6 (2)      |
| C11-C12-C13 | 113.6 (2)      |
| C12-C11-N1  | 111.5 (2)      |
| N2-C7-N1    | 118.4 (2)      |
| C1-C7-N1    | 118.58 (19)    |
| C1-C7-N2    | 123. (2)       |
| C20-C19-N2  | 111.5 (2)      |
| C21-C20-C19 | 110.3 (2)      |
| C26-C21-C20 | 121.6 (3)      |
| C22-C21-C20 | 120.60 (3)     |
| C22-C21-C26 | 117.7 (3)      |
| C25-C26-C21 | 121.5 (3)      |
| C24-C25-C26 | 118.4 (3)      |
| C25-C24-F2  | 119.1 (3)      |
| C23-C24-F2  | 118.5 (3)      |
| C23-C24-C25 | 122.4 (3)      |
| C7-C1-C2    | 119.2 (2)      |
| C6-C1-C2    | 118.1 (2)      |
| C6-C1-C7    | 122.7 (2)      |
| C4-C3-C2    | 120.6 (2)      |
| C5-C4-C3    | 117.4 (2)      |
| C8-C4-C3    | 121.1 (2)      |
| C8-C4-C5    | 121.6 (2)      |
| C6-C5-C4    | 121.4 (2)      |
| C5-C6-C1    | 120.9 (2)      |
| C9-C8-C4    | 121.0 (2)      |
| C10-C8-C4   | 122.0 (2)      |
| C10-C8-C9   | 117.0 (2)      |
| C8-C9-N3    | 178.5 (3)      |
| C8-C10-N4   | 178.6 (3)      |
| C22-C23-C24 | 118.2 (3)      |
| C23-C22-C21 | 121.7 (3)      |
| C15-C14-C13 | 121.1 (3)      |
| C14-C15-C16 | 117.7 (3)      |

**Table S3.** Bond lengths, bond angles and relevant torsion angles in BMPDQ (Figure S2c).

| Atoms   | Bond Length (Å) |
|---------|-----------------|
| N1-C7   | 1.314 (6)       |
| N2-C7   | 1.314 (6)       |
| N1-C11  | 1.508 (7)       |
| N2-C16  | 1.508 (7)       |
| N1-C14  | 1.518 (8)       |
| N2-C19  | 1.518 (8)       |
| C7-C1   | 1.459(10)       |
| C1-C2   | 1.418 (7)       |
| C1-C6   | 1.418 (7)       |
| C2-C3   | 1.387 (8)       |
| C6-C5   | 1.387 (8)       |
| C5-C4   | 1.444 (6)       |
| C4-C3   | 1.444 (6)       |
| C4-C8   | 1.420 (10)      |
| C8-C10  | 1.409 (8)       |
| C8-C9   | 1.409 (8)       |
| C11-C12 | 1.532 (9)       |
| C12-C13 | 1.544 (10)      |
| C13-C14 | 1.561 (9)       |
| C14-C15 | 1.503 (11)      |
| C16-C17 | 1.532 (9)       |
| C17-C18 | 1.544 (10)      |
| C18-C19 | 1.561 (9)       |
| C19-C20 | 1.503 (11)      |
| N3-C9   | 1.182 (8)       |
| N4-C10  | 1.182 (8)       |

  

| Atoms       | Bond Angle (°) |
|-------------|----------------|
| C11-N1-C7   | 123.7 (5)      |
| C14-N1-C7   | 124.1 (5)      |
| C14-N1-C11  | 111.3 (5)      |
| N1-C7-N1    | 120.7 (7)      |
| C1-C7-N1    | 119.6 (4)      |
| C1-C7-N1    | 119.6 (4)      |
| C1-C2-C3    | 121.5 (6)      |
| C3-C4-C3    | 118.4 (7)      |
| C8-C4-C3    | 120.8 (3)      |
| C8-C4-C3    | 120.8 (3)      |
| C4-C3-C2    | 119.9 (5)      |
| C2-C1-C7    | 120.7 (4)      |
| C2-C1-C7    | 120.7 (4)      |
| C2-C1-C2    | 118.6 (7)      |
| C10-C8-C4   | 121.9 (4)      |
| C10-C8-C4   | 121.9 (4)      |
| C10-C8-C10  | 116.3 (7)      |
| C8-C10-N2   | 177.6 (6)      |
| C12-C11-N1  | 102.2 (5)      |
| C13-C14-N1  | 102.0 (5)      |
| C15-C14-N1  | 111.2 (6)      |
| C15-C14-C13 | 114.0 (6)      |
| C13-C12-C11 | 102.3 (6)      |
| C12-C13-C14 | 104.2 (6)      |

  

| Atoms        | Torsion angle (°) |
|--------------|-------------------|
| N2-C7-C1-C6  | 56.947 (3)        |
| N1-C7-C1-C2  |                   |
| C5-C4-C8-C10 | 15.316(3)         |
| C3-C4-C8-C9  |                   |

**Figure S3.** Absorption and fluorescence excitation spectra of (a, b) BFPDQ and (c, d) BMPDQ in acetonitrile solution (BMPDQ: 2.5  $\mu\text{M}$  and BFPDQ: 4.0  $\mu\text{M}$ ) and the solid state.

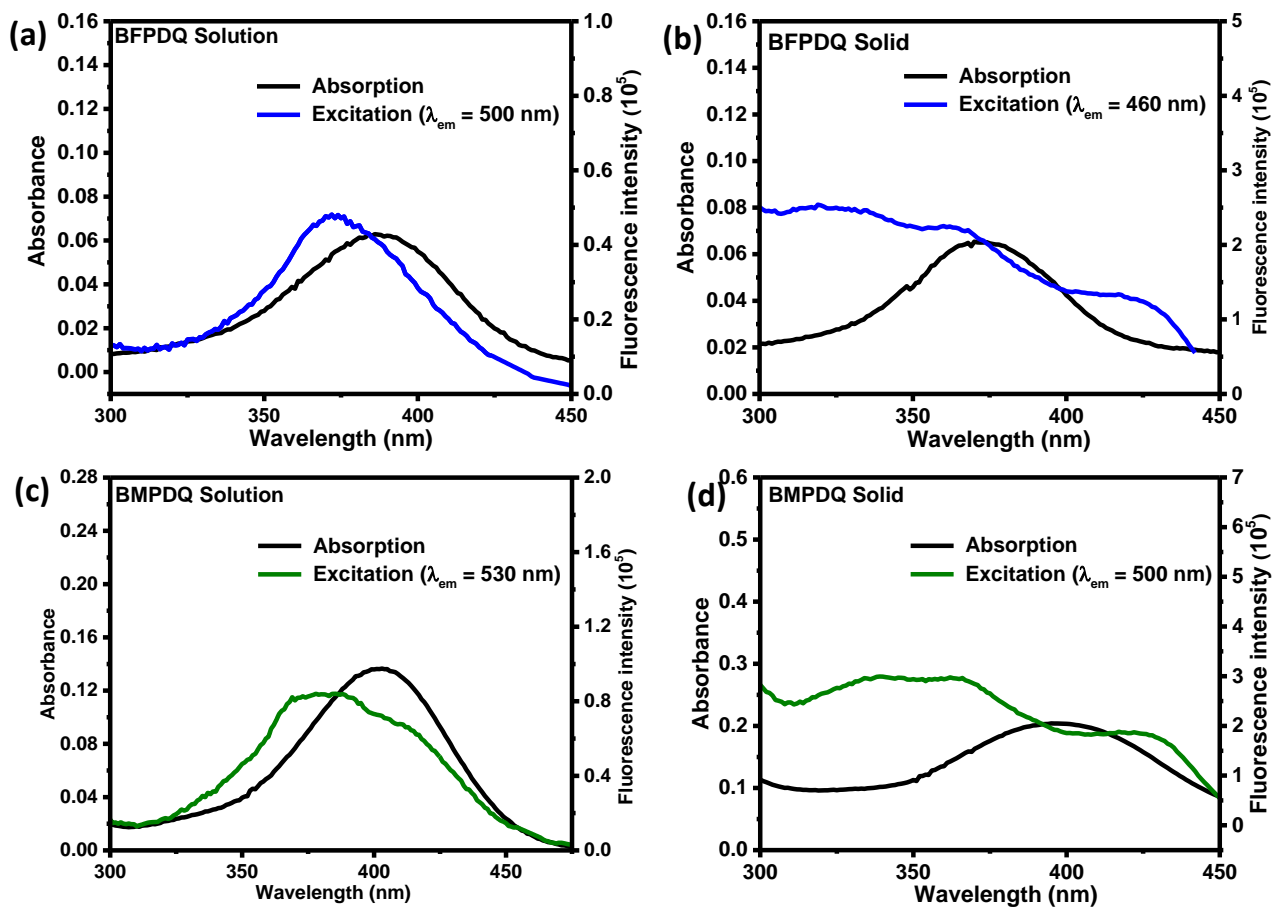



**Figure S4.** (a) Optical images (under UV light) of BFPDQ-PVDF upon exposure to acetic acid vapor for different time periods (min), showing the fluorescence changes and the corresponding fluorescence emission spectra ( $\lambda_{\text{exc}} = 380$  nm). (b) Optical images (under UV light) of BMPDQ-PVDF upon exposure to acetic acid vapor showing the fluorescence changes and the corresponding fluorescence emission spectra ( $\lambda_{\text{exc}} = 395$  nm).

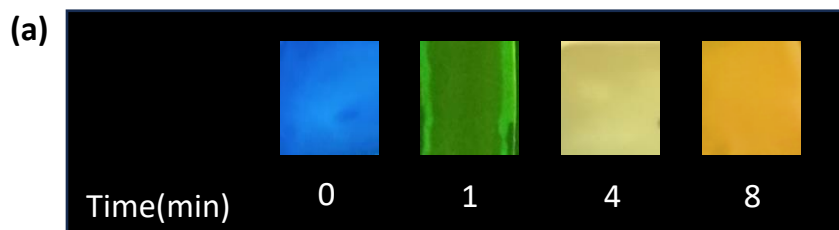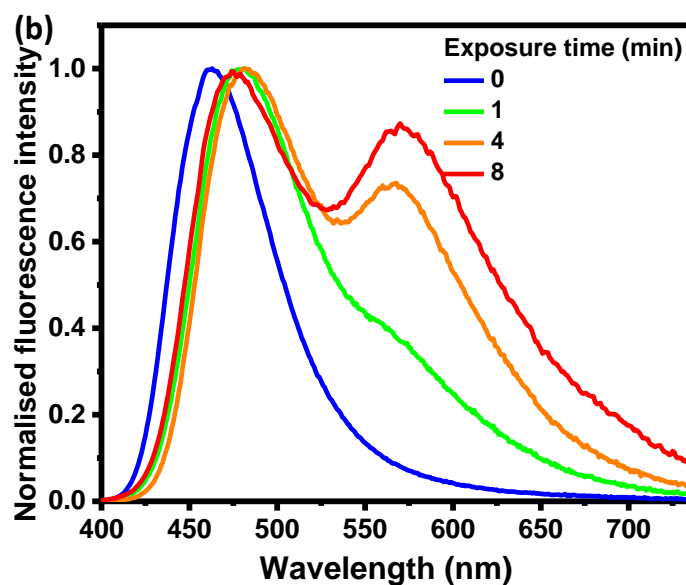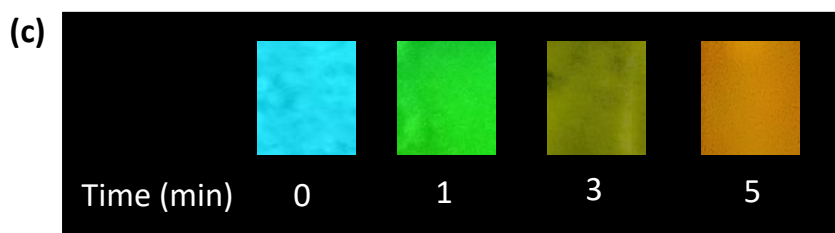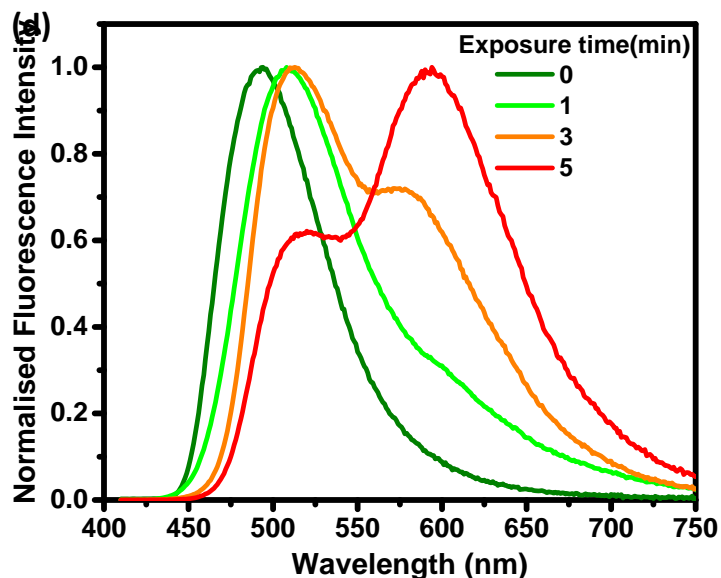

**Figure S5.** (a) Optical images (under UV light) of BMPDQ upon exposure to different acid vapors for 30 min showing the fluorescence changes and (b) the corresponding fluorescence emission spectra ( $\lambda_{\text{exc}} = 395$  nm). A: acetic acid, B: trifluoroacetic acid, C: hydrofluoric acid, D: formic acid.

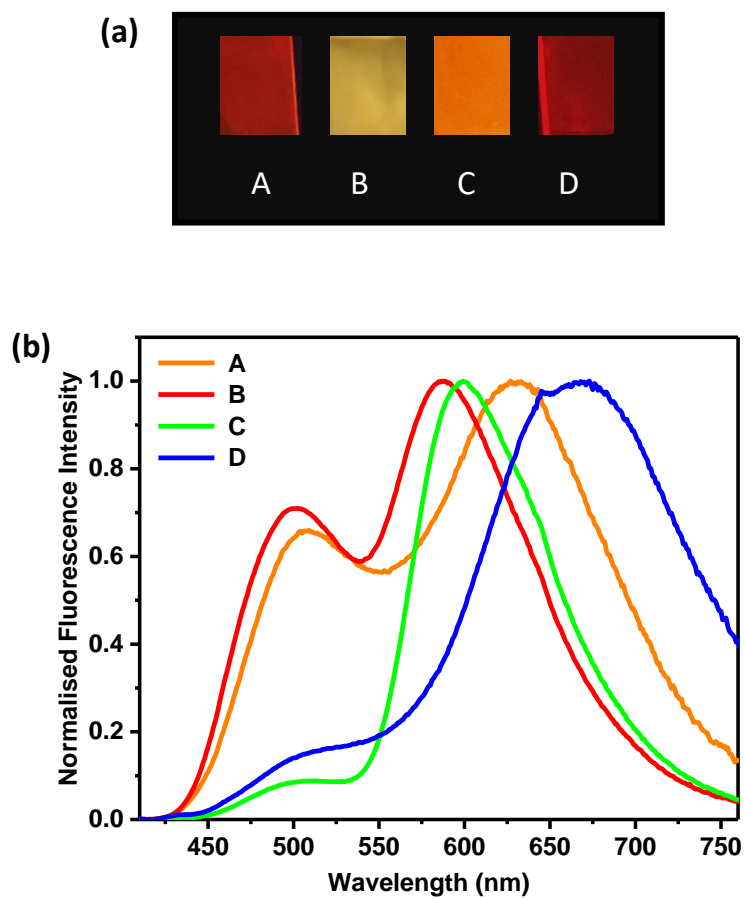

**Figure S6.** Optical images under ambient (left) and UV (right) light: BFPDQ **(a)** as prepared and **(b)** exposed to acetic acid vapor for 30 min followed by recrystallization in methanol. **(c, d)** Similar images of BMPDQ.

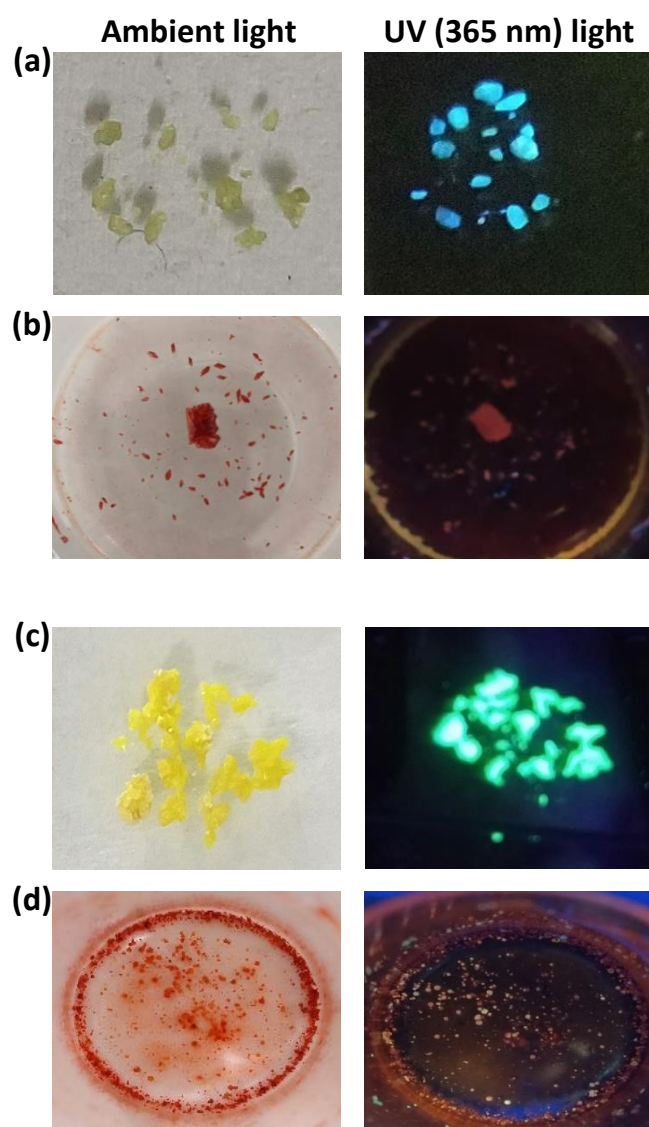

**Figure S7.**  $^{13}\text{C}$  NMR spectra of (a) BFPDQ and (b) BMPDQ before (purple) and after (green) exposure to acetic acid vapor for 15 min; the new peaks are indicated (broken line box).

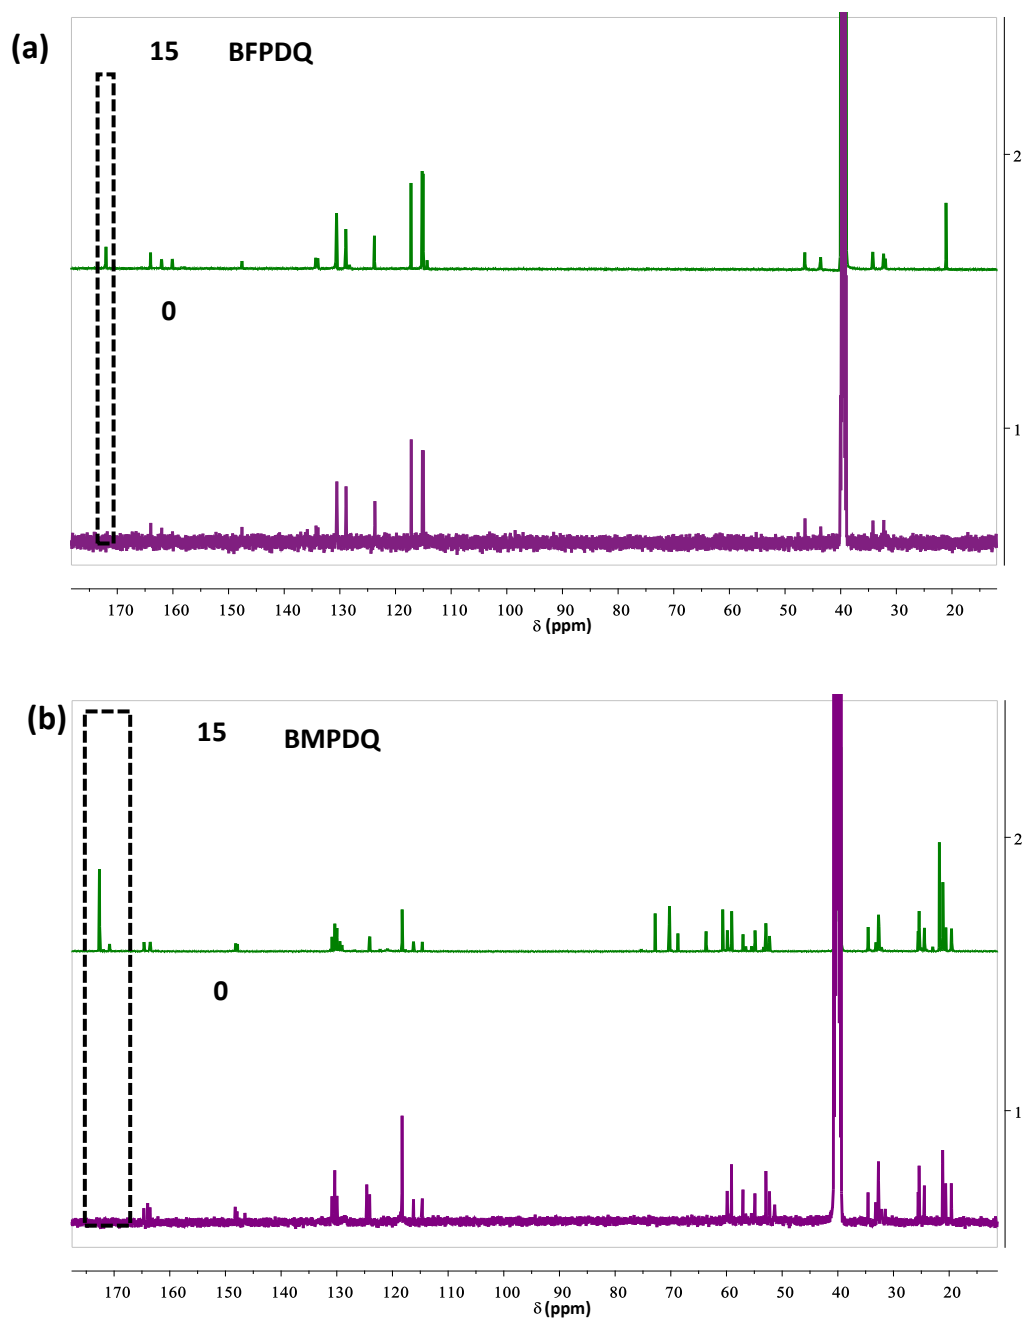

**Figure S8.** High resolution mass spectra of (a) BFPDQ and (b) BMPDQ as prepared and exposed to acetic acid vapor for different time periods (min) at 140 °C; ratio of the intensities of the  $M^+$  and  $M+H^+$  peaks ( $\frac{I_{M+H^+}}{I_{M^+}} = x$ ) are shown in (b). The spectra were recorded on a Bruker Maxis spectrometer, in ESI mode.

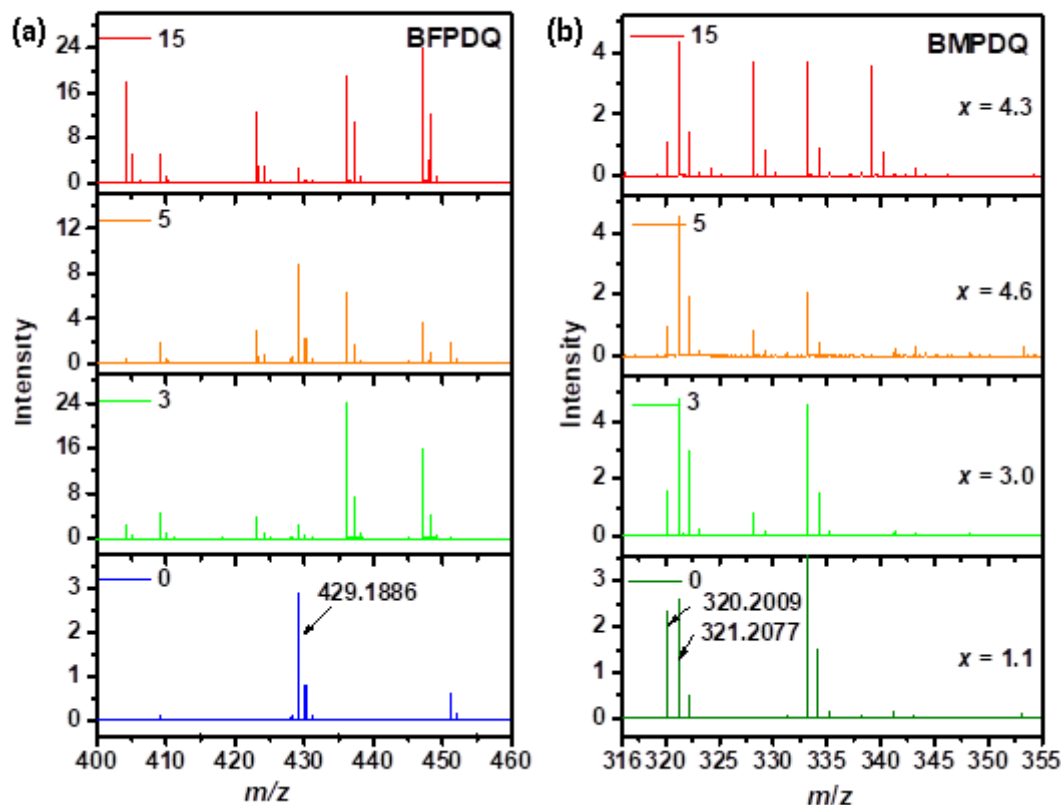

**Table S4.** Assignment of the prominent peaks in the HRMS of BFPDQ and BMPDQ.

| BFPDQ     |                                    |                                |
|-----------|------------------------------------|--------------------------------|
| $m/z$     | Formula                            | Assignment                     |
| 429.1886  | $C_{26}H_{22}N_4F_2 + H^+$         | $[M + H]^+$                    |
| 451.1694  | $C_{26}H_{22}N_4F_2 + Na^+$        | $[M + Na]^+$                   |
| 436.1879* | $C_{24}H_{22}N_2F_2 CH_3COO + H^+$ | $[M [-2(CN) + CH_3COO] + H]^+$ |
| 447.2033* | $C_{26}H_{21}N_4F + K^+$           | $[M - (H) - (F)] + K^+$        |
| BMPDQ     |                                    |                                |
| $m/z$     | Formula                            | Assignment                     |
| 320.2009  | $C_{20}H_{24}N_4$                  | $[M]^+$                        |
| 321.2077  | $C_{20}H_{24}N_4 + H^+$            | $[M + H]^+$                    |
| 333.1616  | $C_{19}H_{24}N_3 + K^+$            | $[M - CN] + [K]^+$             |
| 328.1996* | $C_{18}H_{24}N_2 CH_3COO + H^+$    | $[M [-2(CN) + CH_3COO] + H]^+$ |

\*Arising as a consequence of the protonation

## Computational Details

The salient results of the TD-DFT computation (B3LYP/6-31G\*) using the electronic ground state (from the crystal structure) and optimized electronic excited state structures are provided below. The excited states with high oscillator strength ( $f$ ) are listed; the corresponding energies (in eV and nm), MOs involved in the excitation, and their relative contributions are listed.

### Ground state geometry

#### $\epsilon = 0$

|               |       |           |           |           |            |                                  |
|---------------|-------|-----------|-----------|-----------|------------|----------------------------------|
| Excited State | 1:    | Singlet-A | 2.9442 eV | 421.11 nm | $f=0.6209$ | $\langle S^{*2} \rangle = 0.000$ |
|               | 84 -> | 87        | -0.10922  |           |            |                                  |
|               | 86 -> | 87        | 0.69432   |           |            |                                  |
| Excited State | 3:    | Singlet-A | 4.6842 eV | 264.69 nm | $f=0.2376$ | $\langle S^{*2} \rangle = 0.000$ |
|               | 86 -> | 89        | 0.69341   |           |            |                                  |
| Excited State | 7:    | Singlet-A | 5.8159 eV | 213.18 nm | $f=0.2465$ | $\langle S^{*2} \rangle = 0.000$ |
|               | 82 -> | 87        | 0.68541   |           |            |                                  |

#### $\epsilon = 1.6$

|               |       |           |           |           |            |                                  |
|---------------|-------|-----------|-----------|-----------|------------|----------------------------------|
| Excited State | 1:    | Singlet-A | 3.0701 eV | 403.84 nm | $f=0.7218$ | $\langle S^{*2} \rangle = 0.000$ |
|               | 84 -> | 87        | -0.11207  |           |            |                                  |
|               | 86 -> | 87        | 0.69142   |           |            |                                  |
| Excited State | 6:    | Singlet-A | 5.6985 eV | 217.57 nm | $f=0.2907$ | $\langle S^{*2} \rangle = 0.000$ |
|               | 83 -> | 87        | 0.68466   |           |            |                                  |
| Excited State | 12:   | Singlet-A | 6.8267 eV | 181.62 nm | $f=0.5296$ | $\langle S^{*2} \rangle = 0.000$ |
|               | 77 -> | 87        | 0.11518   |           |            |                                  |
|               | 84 -> | 89        | 0.21904   |           |            |                                  |
|               | 85 -> | 88        | 0.62735   |           |            |                                  |
|               | 86 -> | 101       | -0.10641  |           |            |                                  |

#### $\epsilon = 1.8$

|               |       |           |           |           |            |                                  |
|---------------|-------|-----------|-----------|-----------|------------|----------------------------------|
| Excited State | 1:    | Singlet-A | 3.1206 eV | 397.31 nm | $f=0.7236$ | $\langle S^{*2} \rangle = 0.000$ |
|               | 84 -> | 87        | -0.11228  |           |            |                                  |
|               | 86 -> | 87        | 0.69095   |           |            |                                  |
| Excited State | 6:    | Singlet-A | 5.6809 eV | 218.25 nm | $f=0.2896$ | $\langle S^{*2} \rangle = 0.000$ |
|               | 83 -> | 87        | 0.68321   |           |            |                                  |
| Excited State | 10:   | Singlet-A | 6.6694 eV | 185.90 nm | $f=0.1926$ | $\langle S^{*2} \rangle = 0.000$ |
|               | 82 -> | 91        | 0.18673   |           |            |                                  |
|               | 84 -> | 88        | -0.20585  |           |            |                                  |
|               | 85 -> | 89        | 0.22871   |           |            |                                  |
|               | 86 -> | 93        | -0.17487  |           |            |                                  |
|               | 86 -> | 94        | 0.53918   |           |            |                                  |

#### $\epsilon = 2$

|               |       |           |           |           |            |                                  |
|---------------|-------|-----------|-----------|-----------|------------|----------------------------------|
| Excited State | 1:    | Singlet-A | 3.1636 eV | 391.91 nm | $f=0.7254$ | $\langle S^{*2} \rangle = 0.000$ |
|               | 84 -> | 87        | -0.11234  |           |            |                                  |
|               | 86 -> | 87        | 0.69057   |           |            |                                  |
| Excited State | 6:    | Singlet-A | 5.6663 eV | 218.81 nm | $f=0.2883$ | $\langle S^{*2} \rangle = 0.000$ |
|               | 83 -> | 87        | 0.68149   |           |            |                                  |
| Excited State | 9:    | Singlet-A | 6.6542 eV | 186.33 nm | $f=0.2063$ | $\langle S^{*2} \rangle = 0.000$ |
|               | 82 -> | 91        | 0.19220   |           |            |                                  |
|               | 84 -> | 88        | -0.11329  |           |            |                                  |
|               | 85 -> | 89        | 0.15980   |           |            |                                  |
|               | 86 -> | 93        | 0.60106   |           |            |                                  |
|               | 86 -> | 94        | 0.15104   |           |            |                                  |

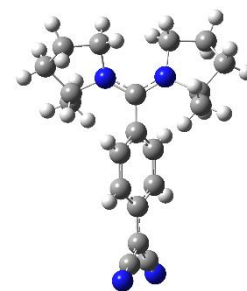

**Ground state molecular structure: from single crystal diffraction study**

**$\epsilon = 3$** 

|               |       |           |           |           |          |              |
|---------------|-------|-----------|-----------|-----------|----------|--------------|
| Excited State | 1:    | Singlet-A | 3.3086 eV | 374.74 nm | f=0.7329 | <S**2>=0.000 |
|               | 84 -> | 87        | -0.11174  |           |          |              |
|               | 86 -> | 87        | 0.68934   |           |          |              |
| Excited State | 9:    | Singlet-A | 6.5952 eV | 187.99 nm | f=0.2217 | <S**2>=0.000 |
|               | 82 -> | 90        | 0.19354   |           |          |              |
|               | 84 -> | 93        | 0.10067   |           |          |              |
|               | 86 -> | 93        | 0.64681   |           |          |              |
| Excited State | 11:   | Singlet-A | 6.8459 eV | 181.11 nm | f=0.5853 | <S**2>=0.000 |
|               | 78 -> | 87        | -0.10637  |           |          |              |
|               | 84 -> | 89        | -0.19590  |           |          |              |
|               | 85 -> | 88        | 0.63729   |           |          |              |

 **$\epsilon = 4$** 

|               |       |           |           |           |          |              |
|---------------|-------|-----------|-----------|-----------|----------|--------------|
| Excited State | 1:    | Singlet-A | 3.3910 eV | 365.63 nm | f=0.7382 | <S**2>=0.000 |
|               | 83 -> | 87        | -0.11082  |           |          |              |
|               | 86 -> | 87        | 0.68871   |           |          |              |
| Excited State | 6:    | Singlet-A | 5.6027 eV | 221.29 nm | f=0.2571 | <S**2>=0.000 |
|               | 83 -> | 88        | 0.10121   |           |          |              |
|               | 84 -> | 87        | 0.65123   |           |          |              |
|               | 85 -> | 87        | -0.20187  |           |          |              |
| Excited State | 11:   | Singlet-A | 6.8527 eV | 180.93 nm | f=0.6046 | <S**2>=0.000 |
|               | 79 -> | 87        | -0.11492  |           |          |              |
|               | 83 -> | 89        | -0.18716  |           |          |              |
|               | 85 -> | 88        | 0.63529   |           |          |              |

 **$\epsilon = 5$** 

|               |       |           |           |           |          |              |
|---------------|-------|-----------|-----------|-----------|----------|--------------|
| Excited State | 1:    | Singlet-A | 3.4441 eV | 359.99 nm | f=0.7419 | <S**2>=0.000 |
|               | 83 -> | 87        | -0.11000  |           |          |              |
|               | 86 -> | 87        | 0.68833   |           |          |              |
| Excited State | 9:    | Singlet-A | 6.5401 eV | 189.58 nm | f=0.2362 | <S**2>=0.000 |
|               | 82 -> | 90        | 0.18986   |           |          |              |
|               | 83 -> | 92        | 0.10189   |           |          |              |
|               | 86 -> | 92        | 0.65316   |           |          |              |
| Excited State | 11:   | Singlet-A | 6.8573 eV | 180.81 nm | f=0.6171 | <S**2>=0.000 |
|               | 79 -> | 87        | -0.12216  |           |          |              |
|               | 83 -> | 89        | -0.18126  |           |          |              |
|               | 84 -> | 88        | -0.12560  |           |          |              |
|               | 85 -> | 88        | 0.63022   |           |          |              |

 **$\epsilon = 6$** 

|               |       |           |           |           |          |              |
|---------------|-------|-----------|-----------|-----------|----------|--------------|
| Excited State | 1:    | Singlet-A | 3.4811 eV | 356.17 nm | f=0.7446 | <S**2>=0.000 |
|               | 83 -> | 87        | 0.10930   |           |          |              |
|               | 86 -> | 87        | 0.68809   |           |          |              |
| Excited State | 9:    | Singlet-A | 6.5253 eV | 190.00 nm | f=0.2405 | <S**2>=0.000 |
|               | 82 -> | 90        | 0.18805   |           |          |              |
|               | 83 -> | 92        | -0.10215  |           |          |              |
|               | 86 -> | 92        | 0.65425   |           |          |              |
| Excited State | 11:   | Singlet-A | 6.8606 eV | 180.72 nm | f=0.6259 | <S**2>=0.000 |
|               | 79 -> | 87        | -0.12537  |           |          |              |
|               | 83 -> | 87        | 0.10384   |           |          |              |
|               | 83 -> | 89        | 0.17699   |           |          |              |
|               | 84 -> | 88        | -0.15992  |           |          |              |
|               | 85 -> | 88        | 0.62247   |           |          |              |

 **$\epsilon = 7$** 

|               |       |           |           |           |          |              |
|---------------|-------|-----------|-----------|-----------|----------|--------------|
| Excited State | 1:    | Singlet-A | 3.5083 eV | 353.40 nm | f=0.7466 | <S**2>=0.000 |
|               | 83 -> | 87        | 0.10873   |           |          |              |
|               | 86 -> | 87        | 0.68792   |           |          |              |
| Excited State | 9:    | Singlet-A | 6.5146 eV | 190.32 nm | f=0.2437 | <S**2>=0.000 |

82 -> 90 0.18667  
 83 -> 92 -0.10234  
 86 -> 92 0.65496  
 Excited State 11: Singlet-A 6.8631 eV 180.65 nm f=0.6322 <S\*\*2>=0.000  
 79 -> 87 -0.12751  
 83 -> 87 0.10882  
 83 -> 89 0.17375  
 84 -> 88 -0.19517  
 85 -> 88 0.61221

 **$\epsilon = 8$** 

Excited State 1: Singlet-A 3.5292 eV 351.31 nm f=0.7482 <S\*\*2>=0.000  
 83 -> 87 0.10826  
 86 -> 87 0.68780  
 Excited State 9: Singlet-A 6.5064 eV 190.56 nm f=0.2462 <S\*\*2>=0.000  
 82 -> 90 0.18556  
 83 -> 92 -0.10249  
 86 -> 92 0.65543  
 Excited State 10: Singlet-A 6.8650 eV 180.60 nm f=0.6371 <S\*\*2>=0.000  
 79 -> 87 -0.12912  
 83 -> 87 0.11281  
 83 -> 89 0.17121  
 84 -> 88 -0.23004  
 85 -> 88 0.59981

 **$\epsilon = 9$** 

Excited State 1: Singlet-A 3.5457 eV 349.67 nm f=0.7495 <S\*\*2>=0.000  
 83 -> 87 0.10786  
 86 -> 87 0.68771  
 Excited State 9: Singlet-A 6.4999 eV 190.75 nm f=0.2482 <S\*\*2>=0.000  
 82 -> 90 0.18467  
 83 -> 92 -0.10260  
 86 -> 92 0.65576  
 Excited State 10: Singlet-A 6.8666 eV 180.56 nm f=0.6409 <S\*\*2>=0.000  
 79 -> 87 -0.13039  
 83 -> 87 0.11607  
 83 -> 89 0.16916  
 84 -> 88 -0.26332  
 85 -> 88 0.58574

 **$\epsilon = 10$** 

Excited State 1: Singlet-A 3.5592 eV 348.35 nm f=0.7505 <S\*\*2>=0.000  
 83 -> 87 0.10752  
 86 -> 87 0.68763  
 Excited State 9: Singlet-A 6.4947 eV 190.90 nm f=0.2498 <S\*\*2>=0.000  
 82 -> 90 0.18393  
 83 -> 92 -0.10268  
 86 -> 92 0.65599  
 Excited State 10: Singlet-A 6.8679 eV 180.53 nm f=0.6439 <S\*\*2>=0.000  
 79 -> 87 -0.13142  
 83 -> 87 0.11879  
 83 -> 89 0.16747  
 84 -> 88 -0.29409  
 85 -> 88 0.57069

 **$\epsilon = 20$** 

Excited State 1: Singlet-A 3.6217 eV 342.34 nm f=0.7556 <S\*\*2>=0.000  
 83 -> 87 0.10575  
 86 -> 87 0.68733  
 Excited State 9: Singlet-A 6.4707 eV 191.61 nm f=0.2576 <S\*\*2>=0.000



|                   |           |           |           |          |              |
|-------------------|-----------|-----------|-----------|----------|--------------|
| 82 -> 90          | 0.18023   |           |           |          |              |
| 83 -> 91          | -0.10294  |           |           |          |              |
| 86 -> 91          | 0.65510   |           |           |          |              |
| Excited State 10: | Singlet-A | 6.8741 eV | 180.36 nm | f=0.6580 | <S**2>=0.000 |
| 79 -> 87          | 0.13621   |           |           |          |              |
| 83 -> 87          | -0.13235  |           |           |          |              |
| 83 -> 89          | -0.15924  |           |           |          |              |
| 84 -> 88          | 0.45456   |           |           |          |              |
| 85 -> 88          | -0.45124  |           |           |          |              |

 **$\epsilon = 30$** 

|                   |           |           |           |          |              |
|-------------------|-----------|-----------|-----------|----------|--------------|
| Excited State 1:  | Singlet-A | 3.6433 eV | 340.31 nm | f=0.7573 | <S**2>=0.000 |
| 83 -> 87          | 0.10506   |           |           |          |              |
| 86 -> 87          | 0.68724   |           |           |          |              |
| Excited State 9:  | Singlet-A | 6.4625 eV | 191.85 nm | f=0.2605 | <S**2>=0.000 |
| 82 -> 90          | 0.17880   |           |           |          |              |
| 83 -> 91          | -0.10332  |           |           |          |              |
| 86 -> 91          | 0.65726   |           |           |          |              |
| Excited State 10: | Singlet-A | 6.8763 eV | 180.31 nm | f=0.6625 | <S**2>=0.000 |
| 79 -> 87          | -0.13781  |           |           |          |              |
| 83 -> 87          | 0.13742   |           |           |          |              |
| 83 -> 89          | 0.15624   |           |           |          |              |
| 84 -> 88          | 0.49782   |           |           |          |              |
| 85 -> 88          | 0.40183   |           |           |          |              |

 **$\epsilon = 40$** 

|                   |           |           |           |          |              |
|-------------------|-----------|-----------|-----------|----------|--------------|
| Excited State 1:  | Singlet-A | 3.6543 eV | 339.28 nm | f=0.7583 | <S**2>=0.000 |
| 83 -> 87          | 0.10470   |           |           |          |              |
| 86 -> 87          | 0.68720   |           |           |          |              |
| Excited State 9:  | Singlet-A | 6.4584 eV | 191.97 nm | f=0.2619 | <S**2>=0.000 |
| 82 -> 90          | 0.17800   |           |           |          |              |
| 83 -> 91          | -0.10341  |           |           |          |              |
| 86 -> 91          | 0.65750   |           |           |          |              |
| Excited State 10: | Singlet-A | 6.8775 eV | 180.28 nm | f=0.6647 | <S**2>=0.000 |
| 79 -> 87          | -0.13857  |           |           |          |              |
| 83 -> 87          | 0.14007   |           |           |          |              |
| 83 -> 89          | 0.15468   |           |           |          |              |
| 84 -> 88          | 0.51511   |           |           |          |              |
| 85 -> 88          | 0.37870   |           |           |          |              |

**Excited state geometry:** **$\epsilon = 0$** 

|               |       |           |           |            |          |              |
|---------------|-------|-----------|-----------|------------|----------|--------------|
| Excited State | 1:    | Singlet-A | 1.0910 eV | 1136.45 nm | f=0.0006 | <S**2>=0.000 |
|               | 84 -> | 87        | -0.16142  |            |          |              |
|               | 86 -> | 87        | 0.68587   |            |          |              |
| Excited State | 4:    | Singlet-A | 4.0500 eV | 306.13 nm  | f=0.4911 | <S**2>=0.000 |
|               | 84 -> | 87        | -0.42807  |            |          |              |
|               | 86 -> | 87        | -0.11478  |            |          |              |
|               | 86 -> | 88        | 0.52511   |            |          |              |
| Excited State | 5:    | Singlet-A | 4.0581 eV | 305.52 nm  | f=0.3173 | <S**2>=0.000 |
|               | 76 -> | 87        | 0.12165   |            |          |              |
|               | 84 -> | 87        | 0.49539   |            |          |              |
|               | 86 -> | 87        | 0.12603   |            |          |              |
|               | 86 -> | 88        | 0.45688   |            |          |              |

 **$\epsilon = 2$** 

|               |       |           |           |           |          |              |
|---------------|-------|-----------|-----------|-----------|----------|--------------|
| Excited State | 1:    | Singlet-A | 1.7368 eV | 713.86 nm | f=0.0005 | <S**2>=0.000 |
|               | 84 -> | 87        | -0.17360  |           |          |              |
|               | 86 -> | 87        | 0.68281   |           |          |              |
| Excited State | 3:    | Singlet-A | 4.0997 eV | 302.43 nm | f=0.8796 | <S**2>=0.000 |
|               | 86 -> | 88        | 0.69545   |           |          |              |
|               | 86 -> | 88        | 0.69545   |           |          |              |
| Excited State | 13:   | Singlet-A | 6.6149 eV | 187.43 nm | f=0.1891 | <S**2>=0.000 |
|               | 82 -> | 91        | 0.19563   |           |          |              |
|               | 84 -> | 89        | -0.12262  |           |          |              |
|               | 86 -> | 97        | 0.62794   |           |          |              |

 **$\epsilon = 2.8$** 

|               |       |           |           |           |          |              |
|---------------|-------|-----------|-----------|-----------|----------|--------------|
| Excited State | 1:    | Singlet-A | 1.9689 eV | 629.71 nm | f=0.0005 | <S**2>=0.000 |
|               | 84 -> | 87        | -0.17835  |           |          |              |
|               | 86 -> | 87        | 0.68149   |           |          |              |
| Excited State | 3:    | Singlet-A | 4.1597 eV | 298.06 nm | f=0.8698 | <S**2>=0.000 |
|               | 86 -> | 88        | 0.69491   |           |          |              |
| Excited State | 12:   | Singlet-A | 6.5746 eV | 188.58 nm | f=0.2151 | <S**2>=0.000 |
|               | 82 -> | 91        | 0.18914   |           |          |              |
|               | 84 -> | 89        | -0.12828  |           |          |              |
|               | 86 -> | 96        | 0.63043   |           |          |              |

 **$\epsilon = 3$** 

|               |       |           |           |           |          |              |
|---------------|-------|-----------|-----------|-----------|----------|--------------|
| Excited State | 1:    | Singlet-A | 2.0103 eV | 616.76 nm | f=0.0005 | <S**2>=0.000 |
|               | 84 -> | 87        | -0.17916  |           |          |              |
|               | 86 -> | 87        | 0.68124   |           |          |              |
| Excited State | 3:    | Singlet-A | 4.1705 eV | 297.29 nm | f=0.8678 | <S**2>=0.000 |
|               | 86 -> | 88        | 0.69464   |           |          |              |
| Excited State | 12:   | Singlet-A | 6.5675 eV | 188.79 nm | f=0.2189 | <S**2>=0.000 |
|               | 82 -> | 91        | 0.18573   |           |          |              |
|               | 84 -> | 89        | -0.13013  |           |          |              |
|               | 85 -> | 88        | -0.10302  |           |          |              |
|               | 86 -> | 95        | 0.11884   |           |          |              |
|               | 86 -> | 96        | 0.62448   |           |          |              |

 **$\epsilon = 4$** 

|               |       |           |           |           |          |              |
|---------------|-------|-----------|-----------|-----------|----------|--------------|
| Excited State | 1:    | Singlet-A | 2.1619 eV | 573.50 nm | f=0.0004 | <S**2>=0.000 |
|               | 84 -> | 87        | -0.18047  |           |          |              |
|               | 86 -> | 87        | 0.68031   |           |          |              |
| Excited State | 3:    | Singlet-A | 4.2106 eV | 294.46 nm | f=0.8499 | <S**2>=0.000 |
|               | 86 -> | 88        | 0.68719   |           |          |              |
| Excited State | 12:   | Singlet-A | 6.5421 eV | 189.52 nm | f=0.2320 | <S**2>=0.000 |
|               | 82 -> | 90        | -0.10334  |           |          |              |

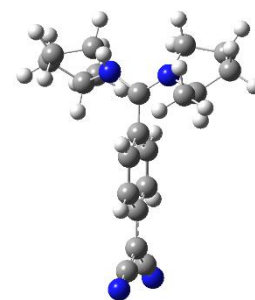

Excited state optimised  
molecular structure

82 -> 91 -0.15750  
 84 -> 89 0.13687  
 85 -> 88 0.12920  
 86 -> 95 0.61332  
 86 -> 96 0.13990

 **$\epsilon = 5$** 

Excited State 1: Singlet-A 2.2585 eV 548.98 nm f=0.0004 <S\*\*2>=0.000  
 83 -> 87 -0.13136  
 84 -> 87 -0.13018  
 86 -> 87 0.67969  
 Excited State 4: Singlet-A 4.2379 eV 292.56 nm f=0.8003 <S\*\*2>=0.000  
 83 -> 87 -0.13869  
 84 -> 87 0.12223  
 86 -> 88 0.66429  
 Excited State 13: Singlet-A 6.7259 eV 184.34 nm f=0.2314 <S\*\*2>=0.000  
 77 -> 87 0.16292  
 78 -> 87 -0.17937  
 83 -> 88 -0.26286  
 84 -> 88 -0.26340  
 85 -> 89 0.50751

 **$\epsilon = 6$** 

Excited State 1: Singlet-A 2.3254 eV 533.16 nm f=0.0004 <S\*\*2>=0.000  
 83 -> 87 -0.18080  
 86 -> 87 0.67925  
 Excited State 4: Singlet-A 4.2554 eV 291.36 nm f=0.8502 <S\*\*2>=0.000  
 86 -> 88 0.69196  
 Excited State 13: Singlet-A 6.7309 eV 184.20 nm f=0.2406 <S\*\*2>=0.000  
 78 -> 87 0.18606  
 83 -> 88 -0.36242  
 84 -> 89 0.11402  
 85 -> 89 0.51657

 **$\epsilon = 7$** 

Excited State 1: Singlet-A 2.3747 eV 522.11 nm f=0.0004 <S\*\*2>=0.000  
 83 -> 87 -0.18528  
 86 -> 87 0.67892  
 Excited State 4: Singlet-A 4.2687 eV 290.45 nm f=0.8526 <S\*\*2>=0.000  
 86 -> 88 0.69391  
 Excited State 11: Singlet-A 6.5074 eV 190.53 nm f=0.2488 <S\*\*2>=0.000  
 82 -> 90 0.16190  
 83 -> 89 -0.15009  
 85 -> 88 -0.16957  
 86 -> 93 0.61518

 **$\epsilon = 8$** 

Excited State 1: Singlet-A 2.4124 eV 513.95 nm f=0.0004 <S\*\*2>=0.000  
 83 -> 87 -0.18699  
 86 -> 87 0.67867  
 Excited State 4: Singlet-A 4.2789 eV 289.76 nm f=0.8525 <S\*\*2>=0.000  
 86 -> 88 0.69444  
 Excited State 11: Singlet-A 6.5023 eV 190.68 nm f=0.2533 <S\*\*2>=0.000  
 82 -> 90 -0.16110  
 83 -> 89 0.15413  
 85 -> 88 0.17692  
 86 -> 92 0.61461

 **$\epsilon = 9$** 

Excited State 1: Singlet-A 2.4422 eV 507.67 nm f=0.0004 <S\*\*2>=0.000

83 -> 87 -0.18803  
 86 -> 87 0.67846  
 Excited State 4: Singlet-A 4.2870 eV 289.21 nm f=0.8521 <S\*\*2>=0.000  
 86 -> 88 0.69466  
 Excited State 11: Singlet-A 6.4982 eV 190.80 nm f=0.2561 <S\*\*2>=0.000  
 82 -> 90 -0.15793  
 83 -> 89 0.15689  
 85 -> 88 0.18219  
 86 -> 92 0.61307

 **$\epsilon = 10$** 

Excited State 1: Singlet-A 2.4664 eV 502.69 nm f=0.0004 <S\*\*2>=0.000  
 83 -> 87 -0.18877  
 86 -> 87 0.67830  
 Excited State 4: Singlet-A 4.2936 eV 288.76 nm f=0.8515 <S\*\*2>=0.000  
 86 -> 88 0.69478  
 Excited State 11: Singlet-A 6.4950 eV 190.89 nm f=0.2583 <S\*\*2>=0.000  
 82 -> 90 -0.15341  
 83 -> 89 0.15902  
 85 -> 88 0.18608  
 86 -> 92 0.61133

 **$\epsilon = 12$** 

Excited State 1: Singlet-A 2.5033 eV 495.29 nm f=0.0004 <S\*\*2>=0.000  
 83 -> 87 -0.18980  
 86 -> 87 0.67804  
 Excited State 4: Singlet-A 4.3037 eV 288.09 nm f=0.8506 <S\*\*2>=0.000  
 86 -> 88 0.69488  
 Excited State 11: Singlet-A 6.4901 eV 191.04 nm f=0.2614 <S\*\*2>=0.000  
 82 -> 90 -0.14189  
 83 -> 89 0.16217  
 85 -> 88 0.19110  
 86 -> 92 0.60825

 **$\epsilon = 14$** 

Excited State 1: Singlet-A 2.5300 eV 490.05 nm f=0.0004 <S\*\*2>=0.000  
 83 -> 87 -0.19050  
 86 -> 87 0.67786  
 Excited State 4: Singlet-A 4.3110 eV 287.60 nm f=0.8499 <S\*\*2>=0.000  
 86 -> 88 0.69492  
 Excited State 11: Singlet-A 6.4867 eV 191.14 nm f=0.2636 <S\*\*2>=0.000  
 81 -> 90 0.10901  
 82 -> 90 -0.12928  
 83 -> 89 0.16442  
 85 -> 88 0.19387  
 86 -> 92 0.60576

 **$\epsilon = 16$** 

Excited State 1: Singlet-A 2.5503 eV 486.15 nm f=0.0004 <S\*\*2>=0.000  
 83 -> 87 -0.19102  
 86 -> 87 0.67772  
 Excited State 4: Singlet-A 4.3165 eV 287.23 nm f=0.8493 <S\*\*2>=0.000  
 86 -> 88 0.69494  
 Excited State 11: Singlet-A 6.4842 eV 191.21 nm f=0.2651 <S\*\*2>=0.000  
 81 -> 90 -0.12055  
 82 -> 90 -0.11757  
 83 -> 89 0.16612  
 85 -> 88 0.19537  
 86 -> 92 0.60374

**$\epsilon = 18$** 

Excited State 1: Singlet-A 2.5663 eV 483.13 nm  $f=0.0004$   $\langle S^{**2} \rangle = 0.000$   
 83 -> 87 -0.19142  
 86 -> 87 0.67761  
 Excited State 4: Singlet-A 4.3209 eV 286.94 nm  $f=0.8489$   $\langle S^{**2} \rangle = 0.000$   
 86 -> 88 0.69495  
 Excited State 11: Singlet-A 6.4822 eV 191.27 nm  $f=0.2663$   $\langle S^{**2} \rangle = 0.000$   
 81 -> 90 -0.12864  
 82 -> 90 -0.10764  
 83 -> 89 0.16744  
 84 -> 88 0.10581  
 85 -> 88 0.19612  
 86 -> 92 0.60209

 **$\epsilon = 20$** 

Excited State 1: Singlet-A 2.5791 eV 480.72 nm  $f=0.0004$   $\langle S^{**2} \rangle = 0.000$   
 83 -> 87 -0.19174  
 86 -> 87 0.67752  
 Excited State 4: Singlet-A 4.3244 eV 286.71 nm  $f=0.8485$   $\langle S^{**2} \rangle = 0.000$   
 86 -> 88 0.69496  
 Excited State 11: Singlet-A 6.4807 eV 191.31 nm  $f=0.2673$   $\langle S^{**2} \rangle = 0.000$   
 81 -> 90 -0.13428  
 83 -> 89 0.16850  
 84 -> 88 0.11222  
 85 -> 88 0.19644  
 86 -> 92 0.60071

 **$\epsilon = 30$** 

Excited State 1: Singlet-A 2.6182 eV 473.55 nm  $f=0.0004$   $\langle S^{**2} \rangle = 0.000$   
 83 -> 87 -0.19268  
 86 -> 87 0.67724  
 Excited State 4: Singlet-A 4.3351 eV 286.00 nm  $f=0.8474$   $\langle S^{**2} \rangle = 0.000$   
 86 -> 88 0.69496  
 Excited State 11: Singlet-A 6.4761 eV 191.45 nm  $f=0.2701$   $\langle S^{**2} \rangle = 0.000$   
 81 -> 90 -0.14617  
 83 -> 89 0.17171  
 84 -> 88 0.13305  
 85 -> 88 0.19572  
 86 -> 92 0.59627

 **$\epsilon = 40$** 

Excited State 1: Singlet-A 2.6380 eV 469.99 nm  $f=0.0004$   $\langle S^{**2} \rangle = 0.000$   
 83 -> 87 -0.19315  
 86 -> 87 0.67710  
 Excited State 4: Singlet-A 4.3405 eV 285.64 nm  $f=0.8468$   $\langle S^{**2} \rangle = 0.000$   
 86 -> 88 0.69496  
 Excited State 11: Singlet-A 6.4738 eV 191.52 nm  $f=0.2715$   $\langle S^{**2} \rangle = 0.000$   
 81 -> 90 -0.14959  
 83 -> 89 0.17332  
 84 -> 88 -0.14417  
 85 -> 88 0.19439  
 86 -> 92 0.59388

**Table S5.** Excited states computed for the ground state geometry (from crystal structure) of BMPDQ under different dielectric constants ( $\epsilon$ ); the wavelength ( $\lambda_{\max}$ ) and the corresponding oscillator strength ( $f$ ) for the excitations with high oscillator strength are shown.

| $\epsilon$ | Excitation 1          |      | Excitation 2          |      | Excitation 3          |      |
|------------|-----------------------|------|-----------------------|------|-----------------------|------|
|            | $\lambda_{\max}$ (nm) | $f$  | $\lambda_{\max}$ (nm) | $f$  | $\lambda_{\max}$ (nm) | $f$  |
| <b>0</b>   | 421.11                | 0.62 | 264.69                | 0.23 | 213.18                | 0.24 |
| <b>1.6</b> | 403.84                | 0.72 | 217.57                | 0.29 | 181.62                | 0.52 |
| <b>1.8</b> | 397.31                | 0.72 | 257.49                | 0.19 | 218.25                | 0.28 |
| <b>2</b>   | 391.1                 | 0.72 | 218.81                | 0.28 | 186.33                | 0.20 |
| <b>3</b>   | 374.4                 | 0.73 | 187.9                 | 0.22 | 181.11                | 0.58 |
| <b>4</b>   | 365.63                | 0.73 | 221.29                | 0.25 | 180.93                | 0.60 |
| <b>5</b>   | 359.99                | 0.74 | 189.5                 | 0.23 | 180.81                | 0.61 |
| <b>6</b>   | 356.17                | 0.74 | 190.00                | 0.24 | 180.72                | 0.62 |
| <b>7</b>   | 353.4                 | 0.74 | 190.32                | 0.24 | 180.65                | 0.63 |
| <b>8</b>   | 351.31                | 0.74 | 190.56                | 0.24 | 180.60                | 0.63 |
| <b>9</b>   | 349.67                | 0.74 | 190.75                | 0.24 | 180.56                | 0.64 |
| <b>10</b>  | 348.35                | 0.75 | 190.90                | 0.24 | 180.53                | 0.64 |
| <b>20</b>  | 342.34                | 0.75 | 191.61                | 0.25 | 180.36                | 0.65 |
| <b>30</b>  | 340.31                | 0.75 | 191.85                | 0.26 | 180.31                | 0.66 |
| <b>40</b>  | 339.3                 | 0.75 | 191.97                | 0.26 | 180.28                | 0.66 |

**Table S6.** Excited states computed for the optimized excited state geometry of BMPDQ under different dielectric constants ( $\epsilon$ ); the wavelength ( $\lambda_{\max}$ ) and the corresponding oscillator strength ( $f$ ) for the excitations with high oscillator strength are shown.

| $\epsilon$ | Excitation 1          |        | Excitation 2          |      | Excitation 3          |      |
|------------|-----------------------|--------|-----------------------|------|-----------------------|------|
|            | $\lambda_{\max}$ (nm) | $f$    | $\lambda_{\max}$ (nm) | $f$  | $\lambda_{\max}$ (nm) | $f$  |
| <b>0</b>   | 1136.45               | 0.0006 | 306.18                | 0.49 | 305.52                | 0.31 |
| <b>2</b>   | 713.86                | 0.0005 | 302.43                | 0.87 | 187.43                | 0.18 |
| <b>2.8</b> | 629.71                | 0.0005 | 298.06                | 0.86 | 188.58                | 0.21 |
| <b>3</b>   | 616.76                | 0.0005 | 297.29                | 0.86 | 188.79                | 0.21 |
| <b>4</b>   | 573.50                | 0.0004 | 294.46                | 0.84 | 189.52                | 0.23 |
| <b>5</b>   | 548.98                | 0.0004 | 292.56                | 0.80 | 184.34                | 0.23 |
| <b>6</b>   | 533.16                | 0.0004 | 291.36                | 0.85 | 184.20                | 0.24 |
| <b>7</b>   | 522.11                | 0.0004 | 290.45                | 0.85 | 190.53                | 0.24 |
| <b>8</b>   | 513.95                | 0.0004 | 289.76                | 0.85 | 190.68                | 0.25 |
| <b>9</b>   | 507.67                | 0.0004 | 289.21                | 0.85 | 190.80                | 0.25 |
| <b>10</b>  | 502.69                | 0.0004 | 288.76                | 0.85 | 190.89                | 0.25 |
| <b>12</b>  | 495.29                | 0.0004 | 288.09                | 0.85 | 191.04                | 0.26 |
| <b>14</b>  | 490.05                | 0.0004 | 287.60                | 0.84 | 191.14                | 0.26 |
| <b>16</b>  | 486.15                | 0.0004 | 287.23                | 0.84 | 191.21                | 0.26 |
| <b>18</b>  | 483.13                | 0.0004 | 286.94                | 0.84 | 191.27                | 0.26 |
| <b>20</b>  | 480.72                | 0.0004 | 286.71                | 0.84 | 191.31                | 0.26 |
| <b>30</b>  | 473.55                | 0.0004 | 286.00                | 0.84 | 191.45                | 0.27 |
| <b>40</b>  | 469.99                | 0.0004 | 285.64                | 0.84 | 191.52                | 0.27 |

### Capacitance Measurements

**Figure S9.** Construction of a parallel plate capacitor using FTO coated plates and BMPDQ microcrystalline powder sandwiched between the plates.

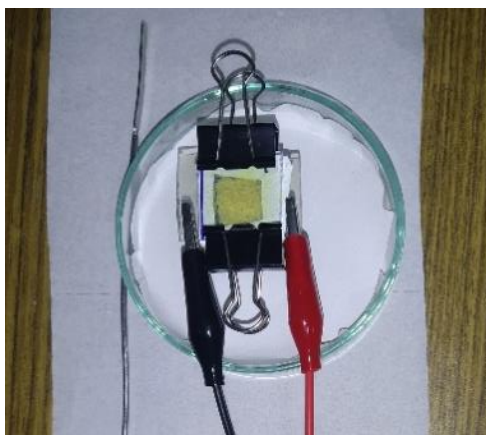

**Table S7.** Equivalent circuits used to simulate the impedance spectrum (at 1 V) of pristine and acetic acid exposed BMPDQ; the dielectric constant estimated\* are also shown.

| Time of exposure (min) | Equivalent circuit | $\epsilon$ |
|------------------------|--------------------|------------|
| 0                      | <br>C = 41.1 pF    | 12.9       |
| 2                      | <br>C = 30.5 pF    | 9.6        |
| 4                      | <br>C = 28.9 pF    | 9.1        |
| 6                      | <br>C = 27.7 pF    | 8.7        |
| 8                      | <br>C = 24.6 pF    | 7.7        |
| 10                     | <br>C = 22.6 pF    | 7.1        |

\*Dielectric constant,  $\epsilon = \frac{Cd}{\epsilon_0 A}$  where  $C$  is the capacitance,  $d$  and  $A$  are the thickness and area of the sample (400  $\mu\text{m}$ , 1.44  $\text{cm}^2$  respectively), and  $\epsilon_0$  is the permittivity of free space ( $8.854 \times 10^{-12} \text{ CV}^{-1} \text{ m}^{-1}$ ).



### Scanning Kelvin Probe Microscopy

**Figure S10.** SKPM topography and surface potential images of BMPDQ **(a)** before and **(b)** after exposure to acetic acid vapor for 15 min. Plots of the surface potential measured on the substrate and BMPDQ before and after exposure to acetic acid vapors corresponding to several points probed on 6 samples are shown in Figure 9 in the main text.

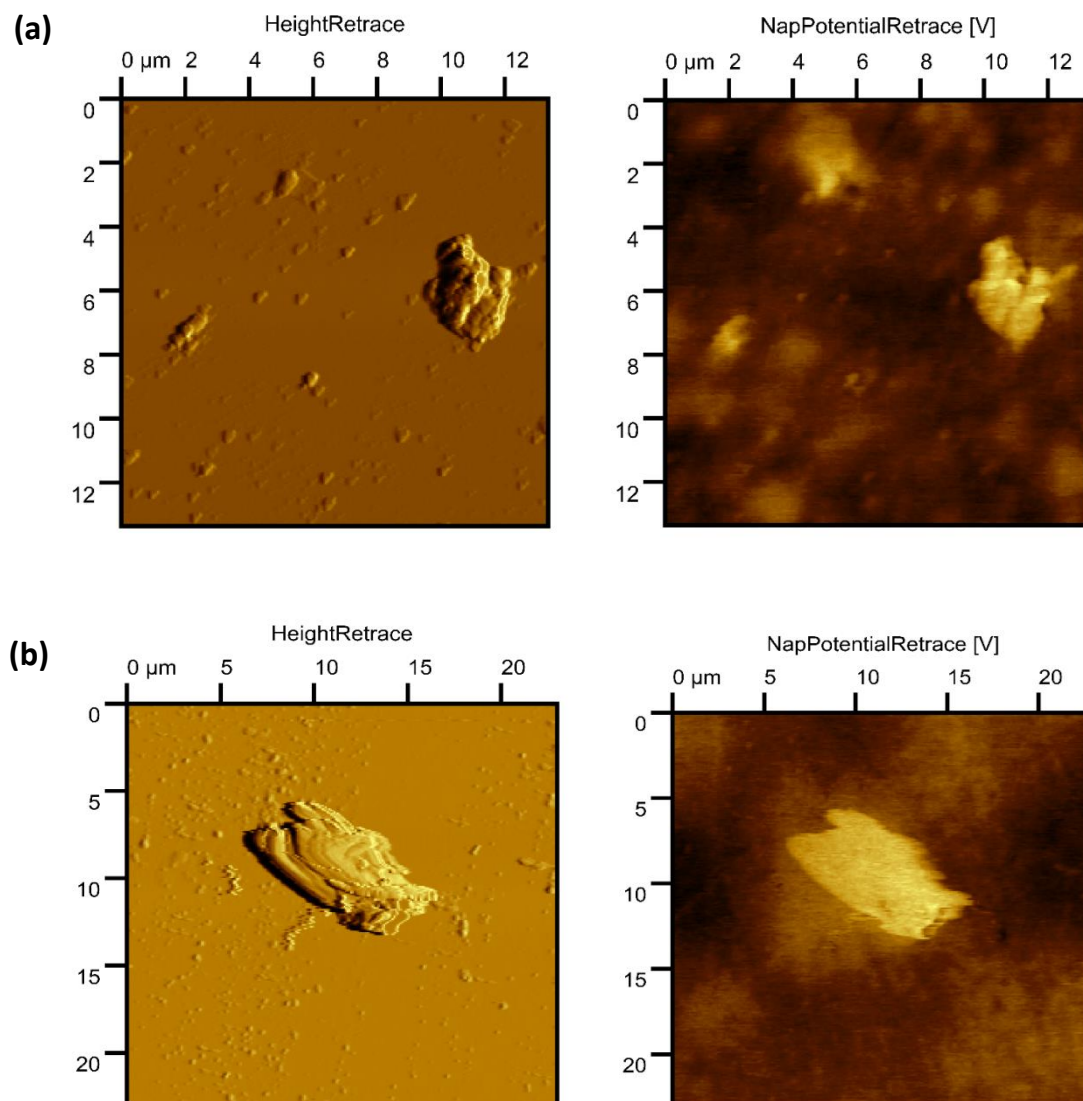

Supplement: d4tc02052a1.pdf [file d4tc02052a1.pdf]
